# Supplementary material for: Detection of Fossil and Biogenic Methane at Regional Scales Using Atmospheric Radiocarbon
Source: PubMed Central journal article supplement — Earths Future. 2019 Mar 18;7(3):283–99. doi: 10.1029/2018EF001064 (PMC6559284; doi:10.1029/2018ef001064), 2019-03-18
Supplement: EFT2-7-283-s001.pdf [file EFT2-7-283-s001.pdf]

**Detection of Fossil and Biogenic Methane at Regional Scales Using Atmospheric Radiocarbon**

H. Graven<sup>1</sup>, T. Hocking<sup>1</sup> and G. Zazzeri<sup>1</sup>

<sup>1</sup>Dept of Physics, Imperial College London, South Kensington Campus, London SW7 2AZ

**Contents of this file**

Calculation of nuclear power plant emissions

Figure S1

Figure S2

Figure S3

Figure S4

Table S1

**Calculation of nuclear power plant emissions**

We calculated nuclear power plant emissions in units of mol yr<sup>-1</sup> by converting the <sup>14</sup>CH<sub>4</sub> emission data reported to the Nuclear Regulatory Commission for 2014-15 in units of Curies (<https://www.nrc.gov/reactors/operating/ops-experience/tritium/plant-info.html>).

A Curie is defined as 37 × 10<sup>9</sup> Bq, and a Bq is defined as one decay per second. As the rate of decay of <sup>14</sup>C is given by the number of atoms divided by the mean life (8267 yr), then the amount in Curies should be multiplied by 37 × 10<sup>9</sup> and by 8267. Converting units to mol yr<sup>-1</sup> involves multiplying by the number of seconds in a year (3.15 × 10<sup>7</sup> s/yr) and dividing by Avogadro's number (6.02 × 10<sup>23</sup> atoms/mol).

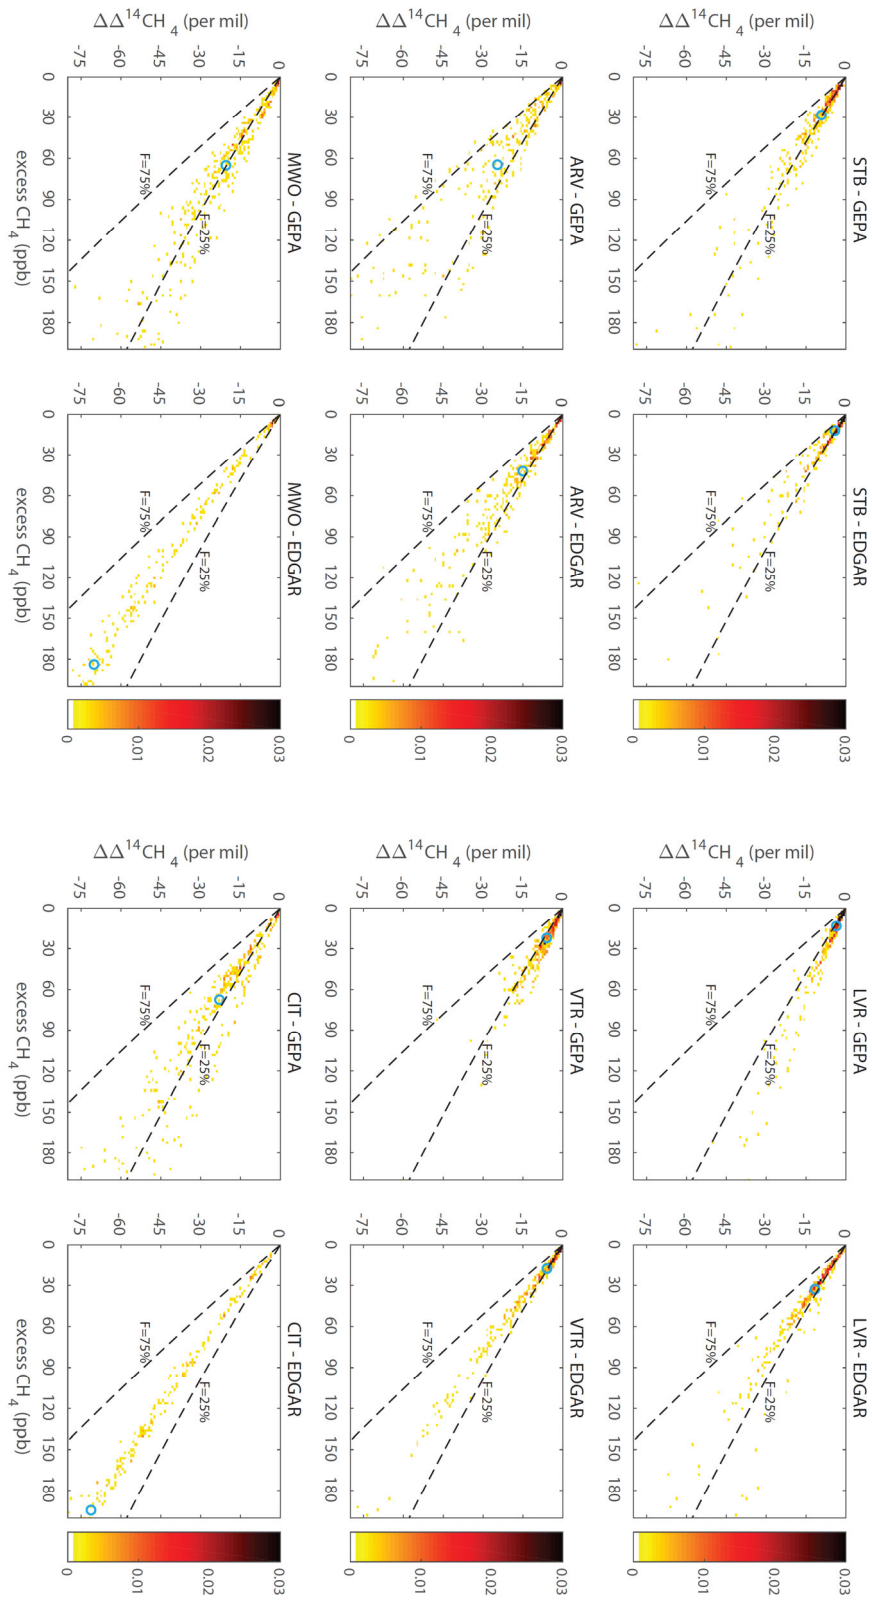

Figure S1. Same as Figure 4 for six other sites.

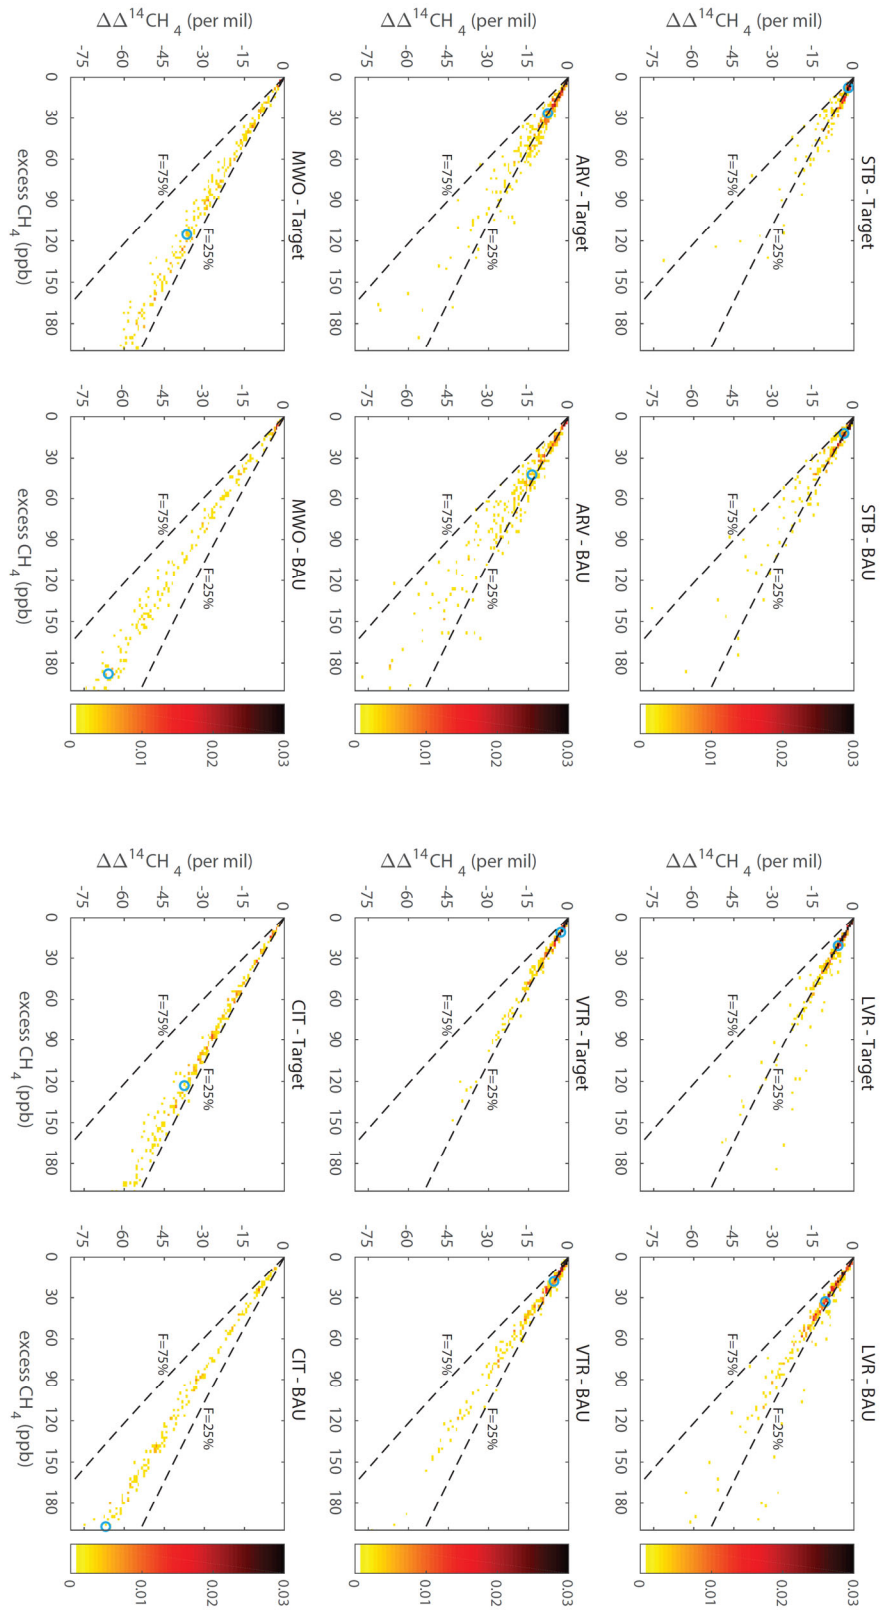

Figure S2. Same as Figure 6 for six other sites.

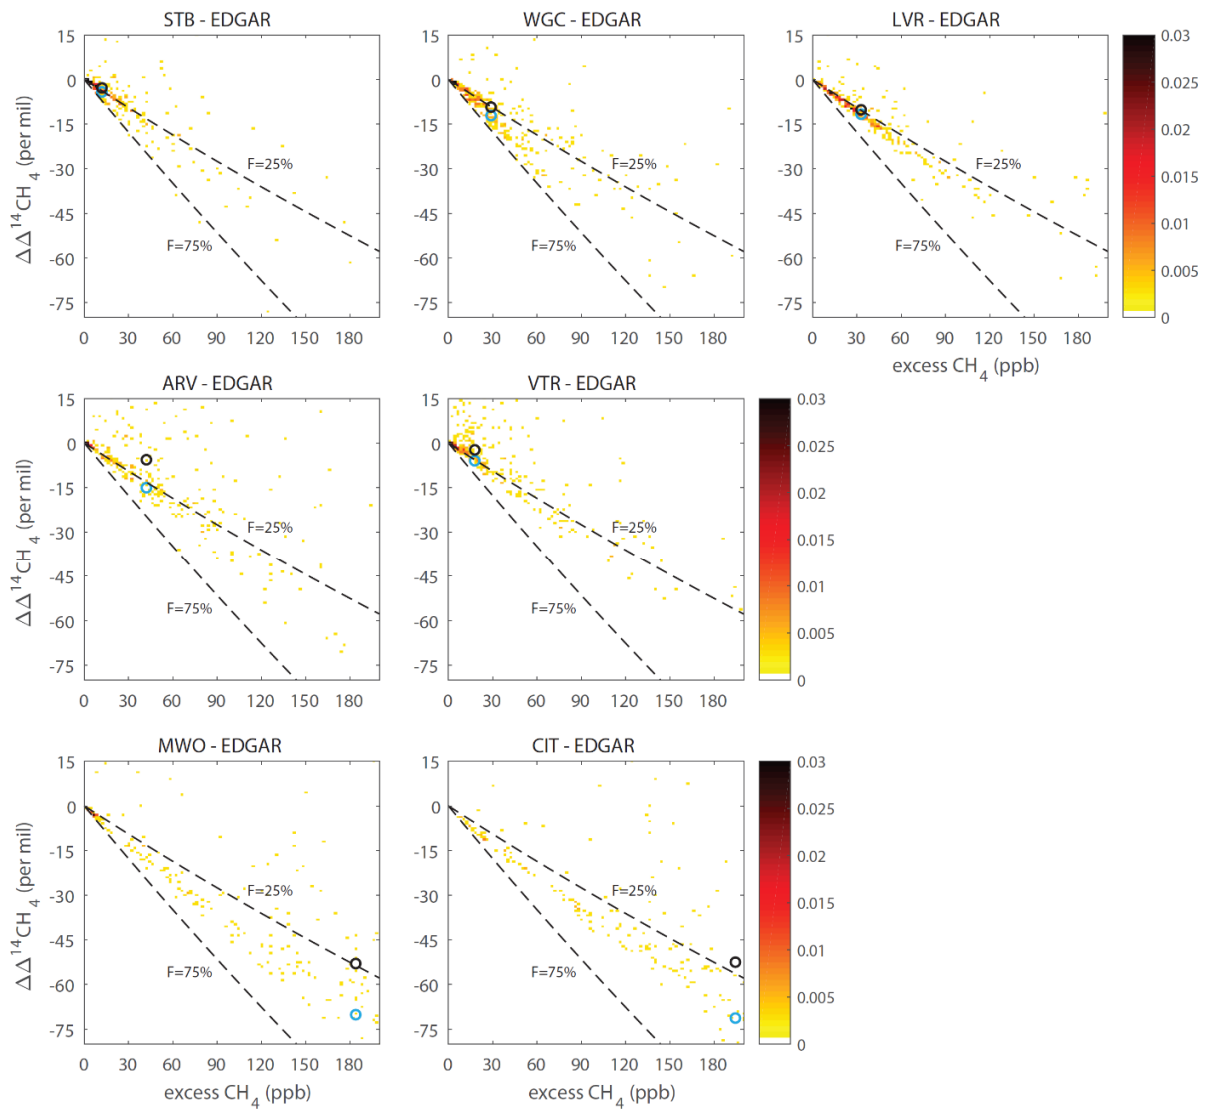

Figure S3. Same as Figure 7b and 7c for seven other sites.

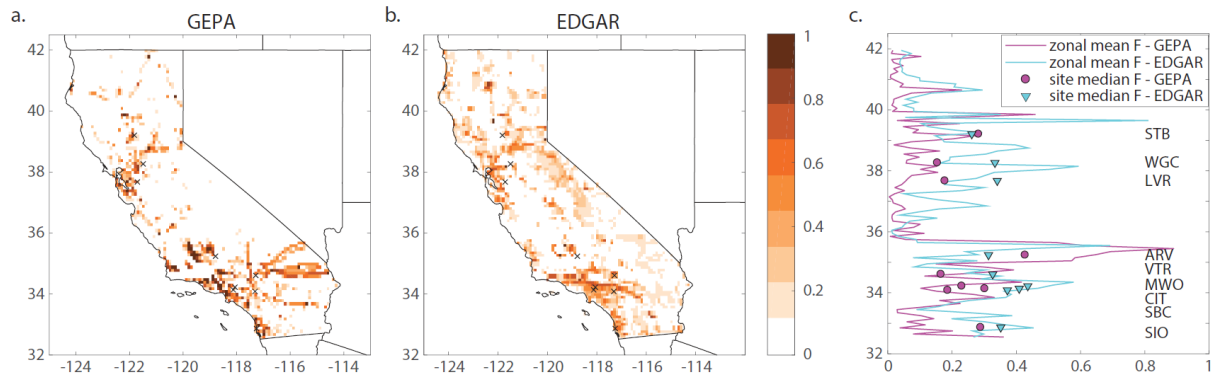

Figure S4. Fossil fraction of CH<sub>4</sub> emissions in California in GEPA [Maasakkers et al., 2016] in a., and in EDGAR [EDGAR, 2011] in b. Observation sites are shown with crosses. Zonally-averaged emission-weighted fossil fraction of emissions in California in GEPA and EDGAR (lines) and median fossil fraction of excess CH<sub>4</sub> concentration for simulations using GEPA and EDGAR (symbols) in c. Observation site codes are listed in c.

**Table S1.** List of specific sectors included in fossil and biogenic categories for GEPA and EDGAR emissions estimates.

|          | GEPA                                                                                                                                                                                                                                                                                                                                               | EDGAR                                                                                                                                                                                                                                                                          |
|----------|----------------------------------------------------------------------------------------------------------------------------------------------------------------------------------------------------------------------------------------------------------------------------------------------------------------------------------------------------|--------------------------------------------------------------------------------------------------------------------------------------------------------------------------------------------------------------------------------------------------------------------------------|
| Fossil   | 1A_Combustion_Mobile<br>1A_Combustion_Stationary<br>1B1a_Abandoned_Coal<br>1B1a_Coal_Mining_Surface<br>1B1a_Coal_Mining_Underground<br>1B2a_Petroleum<br>1B2b_Natural_Gas_Distribution<br>1B2b_Natural_Gas_Processing<br>1B2b_Natural_Gas_Production<br>1B2b_Natural_Gas_Transmission<br>2B5_Petrochemical_Production<br>2C2_Ferroalloy_Production | 1A1_1A2. Energy Manufac. Transf.<br>1A3a_c_d_e. Non-road trans.<br>1A3b. Road Trans.<br>1A4. Energy for Buildings<br>1B1. Fugitive from Solid<br>1B2a. Oil Prod. and Refineries<br>1B2b. Gas Prod. and Dist.<br>2. Industrial Process and Product Use<br>7A. Fossil fuel fires |
| Biogenic | 4A_Enteric_Fermentation<br>4B_Manure_Management<br>4C_Rice_Cultivation<br>4F_Field_Burning<br>5_Forest_Fires<br>6A_Landfills_Industrial<br>6A_Landfills_Municipal<br>6B_Wastewater_Treatment<br>6D_Composting                                                                                                                                      | 4A. Enteric Ferm.<br>4B. Manure Management<br>4C_4D. Agricultural Soils<br>4F. Agricultural Waste Burning<br>5A_C_D_F_4E. Large Scale Biomass Burning<br>6A_6C. Solid Waste Disposal<br>6B. Wastewater                                                                         |
